# Supplementary material
Source: ML conference proceedings conference paper supplement (https://openaccess.thecvf.com/content/CVPR_2020/html/Peng_Large-Scale_Object_Detection_CVPR_2020_paper.html)
Supplement: Supplementary file 1 [file Peng_Large-Scale_Object_Detection_CVPR_2020_supplemental.pdf]

# Supplementary Material for CVPR2020 Submission#4904

## A. ADDITIONAL RESULTS

We visualize the results of our methods in the material. Note all the models in supplementary material are trained in *minitrain* and evaluated on *minival*.

### Concurrent Softmax

Table 1 shows the gain of mAP on some classes with co-occurrence phenomenon. Other results are listed in our supplementary logs. We provide 4 logs: *balance\_bsl\_sm.csv*, *balance\_bsl\_csmconf.csv*, *balance\_cs\_sm.csv* and *balance\_cs\_csmconf.csv*:

- *balance\_bsl\_sm.csv* shows the results of model trained with **vanilla softmax** and tested with **vanilla softmax**.
- *balance\_bsl\_csmconf.csv* shows the results of model trained with **vanilla softmax** and tested with **concurrent softmax**.
- *balance\_cs\_sm.csv* shows the results of model trained with **concurrent softmax** and tested with **vanilla softmax**.
- *balance\_cs\_csmconf.csv* shows the results of model trained with **concurrent softmax** and tested with **concurrent softmax**.

Figure 1 visualizes result of models with and without concurrent softmax during training and testing stage.

### Soft-Balance with Hybrid Training

Figure 2 visualizes the additional results of ground-truth, non-balance, class-aware balance, and soft-balance. It shows that the proposed soft-balance usually yields more detection bboxes than non-balance, and is more accurate than class-aware balance.

**Table 1.** We randomly pick some classes with co-occurrence phenomenon and show the performance gain.

|                |                    |       |         |            |       |         |      |       |            |          |
|----------------|--------------------|-------|---------|------------|-------|---------|------|-------|------------|----------|
| Source Classes | Wood-burning stove | Flute | Blender | Brown bear | Snake | Sparrow | Tea  | Cello | Teddy bear | Antelope |
| mAP w/o CSM    | 0.50               | 0.26  | 0.50    | 0.25       | 0.65  | 0.76    | 0.57 | 0.43  | 0.55       | 0.53     |
| mAP w/ CSM     | 1.00               | 0.63  | 0.83    | 0.50       | 0.89  | 1.00    | 0.80 | 0.65  | 0.75       | 0.72     |
| Gain           | 0.50               | 0.36  | 0.33    | 0.25       | 0.24  | 0.24    | 0.23 | 0.22  | 0.20       | 0.18     |

|                |               |       |           |           |            |      |        |      |         |          |        |
|----------------|---------------|-------|-----------|-----------|------------|------|--------|------|---------|----------|--------|
| Source Classes | Digital clock | Sword | Pineapple | Brassiere | Sea turtle | Crab | Sandal | Boot | Handbag | Sea lion | Coffee |
| mAP w/o CSM    | 0.83          | 0.83  | 0.50      | 0.80      | 0.22       | 0.52 | 0.54   | 0.56 | 0.60    | 0.43     | 0.46   |
| mAP w/ CSM     | 1.00          | 1.00  | 0.67      | 0.97      | 0.38       | 0.67 | 0.68   | 0.70 | 0.73    | 0.46     | 0.58   |
| Gain           | 0.17          | 0.17  | 0.17      | 0.17      | 0.16       | 0.15 | 0.14   | 0.14 | 0.13    | 0.13     | 0.12   |

## B. IMPLICIT CONFUSION PAIR

Table 2 shows the detailed statistics of the confusion pairs explained in section 3 of the main paper. To obtain the confusion pairs, we first calculate the Intersection-over-Union(IoU) between each two instances. Then we mark those instances from different categories with a IoU higher than 0.9 as confusion bboxes. We define the confusion ratio as the number of the confusion bboxes divided by the source bboxes, and we list all 115 pairs of confusion categories whose confusion ratio is higher than 0.1.

**Table 2.** Statistics of the implicit confusion pairs. See the text in Section 3 for definitions of confusion pairs. The first two rows refer to the source and its confusion category. The third row refers to the total instances of source category, and the fourth row indicates how many instances from confused category are labeled as source.

|                   |            |            |         |         |          |       |          |            |                |         |
|-------------------|------------|------------|---------|---------|----------|-------|----------|------------|----------------|---------|
| Source Classes    | Flashlight | Sea turtle | Bread   | Hamster | Sombrero | Tiara | Antelope | Torch      | Blender        | Blender |
| Confusion Classes | Torch      | Tortoise   | Dessert | Mouse   | Sun hat  | Crown | Deer     | Flashlight | Food processor | Mixer   |
| #Source bboxes    | 71         | 1053       | 3691    | 522     | 618      | 383   | 1473     | 17         | 228            | 228     |
| #Confusion bboxes | 11         | 555        | 414     | 139     | 93       | 86    | 534      | 11         | 48             | 37      |

  

|                   |                |         |         |                |                |          |       |               |        |
|-------------------|----------------|---------|---------|----------------|----------------|----------|-------|---------------|--------|
| Source Classes    | Billiard table | Tart    | Fedora  | Food processor | Food processor | Bookcase | Peach | Knife         | Knife  |
| Confusion Classes | Table          | Dessert | Sun hat | Blender        | Mixer          | Shelf    | Apple | Kitchen knife | Dagger |
| #Source bboxes    | 852            | 903     | 3447    | 184            | 184            | 4962     | 742   | 803           | 803    |
| #Confusion bboxes | 248            | 157     | 657     | 48             | 42             | 930      | 76    | 161           | 106    |

  

|                   |           |        |         |                |                    |               |           |           |
|-------------------|-----------|--------|---------|----------------|--------------------|---------------|-----------|-----------|
| Source Classes    | Ambulance | Eagle  | Mixer   | Mixer          | Wood-burning stove | Beaker        | Beehive   | Cupboard  |
| Confusion Classes | Van       | Falcon | Blender | Food processor | Fireplace          | Measuring cup | Honeycomb | Cabinetry |
| #Source bboxes    | 429       | 1599   | 203     | 203            | 289                | 162           | 492       | 1269      |
| #Confusion bboxes | 171       | 562    | 37      | 42             | 67                 | 26            | 147       | 153       |

  

|                   |            |                |         |        |            |             |        |         |         |             |
|-------------------|------------|----------------|---------|--------|------------|-------------|--------|---------|---------|-------------|
| Source Classes    | Grapefruit | Mechanical fan | Shotgun | Tire   | Sandal     | Harpsichord | Violin | Leopard | Leopard | Harbor seal |
| Confusion Classes | Orange     | Ceiling fan    | Rifle   | Wheel  | High heels | Piano       | Cello  | Jaguar  | Cheetah | Sea lion    |
| #Source bboxes    | 1211       | 646            | 539     | 115719 | 2738       | 197         | 2613   | 768     | 768     | 2003        |
| #Confusion bboxes | 285        | 153            | 136     | 17117  | 351        | 57          | 275    | 347     | 370     | 457         |

  

|                   |       |            |                |              |              |        |              |               |      |
|-------------------|-------|------------|----------------|--------------|--------------|--------|--------------|---------------|------|
| Source Classes    | Goose | Coffee cup | Microwave oven | Serving tray | Serving tray | Beer   | Toilet paper | Kitchen knife | Lynx |
| Confusion Classes | Duck  | Mug        | Oven           | Platter      | Plate        | Bottle | Paper towel  | Knife         | Cat  |
| #Source bboxes    | 7948  | 5018       | 458            | 111          | 111          | 9065   | 356          | 333           | 222  |
| #Confusion bboxes | 1077  | 1146       | 89             | 30           | 17           | 920    | 81           | 161           | 76   |

  

|                   |         |              |        |        |                |         |         |      |         |            |      |
|-------------------|---------|--------------|--------|--------|----------------|---------|---------|------|---------|------------|------|
| Source Classes    | Platter | Snowplow     | Saucer | Insect | Ceiling fan    | Jaguar  | Jaguar  | Taxi | Pitcher | High heels | Bust |
| Confusion Classes | Plate   | Land vehicle | Plate  | Spider | Mechanical fan | Leopard | Cheetah | Car  | Jug     | Sandal     | Man  |
| #Source bboxes    | 3317    | 293          | 2681   | 8457   | 446            | 553     | 553     | 3984 | 329     | 2950       | 986  |
| #Confusion bboxes | 983     | 34           | 282    | 1007   | 153            | 347     | 218     | 412  | 121     | 351        | 113  |

  

|                   |        |          |        |        |     |              |       |        |        |                  |         |
|-------------------|--------|----------|--------|--------|-----|--------------|-------|--------|--------|------------------|---------|
| Source Classes    | Bust   | Trombone | Bidet  | Falcon | Fox | Sofa bed     | Desk  | Tick   | Tick   | Filing cabinet   | Mouse   |
| Confusion Classes | Person | Trumpet  | Toilet | Eagle  | Dog | studio couch | Table | Beetle | Insect | Chest of drawers | Hamster |
| #Source bboxes    | 986    | 904      | 411    | 1624   | 528 | 1417         | 11015 | 138    | 138    | 343              | 810     |
| #Confusion bboxes | 169    | 95       | 51     | 562    | 66  | 480          | 1516  | 14     | 18     | 69               | 139     |

  

|                   |        |           |          |          |                  |        |        |            |                 |
|-------------------|--------|-----------|----------|----------|------------------|--------|--------|------------|-----------------|
| Source Classes    | Wine   | Honeycomb | Doughnut | Doughnut | Chest of drawers | Dagger | Dagger | Mug        | Pressure cooker |
| Confusion Classes | Bottle | Beehive   | Dessert  | Bagel    | Cabinetry        | Knife  | Sword  | Coffee cup | Slow cooker     |
| #Source bboxes    | 14458  | 366       | 870      | 870      | 1431             | 350    | 350    | 2140       | 11              |
| #Confusion bboxes | 1540   | 147       | 110      | 197      | 159              | 106    | 132    | 1146       | 4               |

  

|                   |            |        |        |         |             |        |       |      |            |       |            |
|-------------------|------------|--------|--------|---------|-------------|--------|-------|------|------------|-------|------------|
| Source Classes    | Tortoise   | Sword  | Girl   | Seafood | Sea lion    | Tea    | Mule  | Doll | Goggles    | Organ | Cocktail   |
| Confusion Classes | Sea turtle | Dagger | Woman  | Fish    | Harbor seal | Coffee | Horse | Girl | Sunglasses | Piano | Wine glass |
| #Source bboxes    | 1885       | 532    | 185837 | 2894    | 1747        | 1266   | 1068  | 6046 | 9087       | 376   | 4199       |
| #Confusion bboxes | 555        | 132    | 34772  | 292     | 457         | 160    | 196   | 623  | 970        | 40    | 446        |

  

|                   |              |              |          |           |           |        |        |         |       |         |
|-------------------|--------------|--------------|----------|-----------|-----------|--------|--------|---------|-------|---------|
| Source Classes    | Winter melon | Winter melon | Deer     | Briefcase | Briefcase | Cello  | Bull   | Whale   | Crown | Cheetah |
| Confusion Classes | Watermelon   | Cucumber     | Antelope | Handbag   | Suitcase  | Violin | Cattle | Dolphin | Tiara | Leopard |
| #Source bboxes    | 40           | 40           | 3658     | 145       | 145       | 1894   | 1610   | 937     | 656   | 677     |
| #Confusion bboxes | 6            | 4            | 534      | 19        | 19        | 275    | 266    | 180     | 86    | 370     |

  

|                   |         |                |               |          |              |        |        |        |         |         |
|-------------------|---------|----------------|---------------|----------|--------------|--------|--------|--------|---------|---------|
| Source Classes    | Cheetah | Oven           | Measuring cup | Loveseat | Loveseat     | Teapot | Kettle | Spider | Plate   | Bagel   |
| Confusion Classes | Jaguar  | Microwave oven | Beaker        | Sofa bed | studio couch | Kettle | Teapot | Insect | Platter | Dessert |
| #Source bboxes    | 677     | 597            | 70            | 600      | 600          | 604    | 630    | 1876   | 5118    | 589     |
| #Confusion bboxes | 218     | 89             | 26            | 90       | 135          | 185    | 185    | 1007   | 983     | 100     |

  

|                   |          |           |              |         |         |              |               |
|-------------------|----------|-----------|--------------|---------|---------|--------------|---------------|
| Source Classes    | Bagel    | Brassiere | studio couch | Dolphin | Jug     | Paper towel  | Bicycle wheel |
| Confusion Classes | Doughnut | Swimwear  | Sofa bed     | Whale   | Pitcher | Toilet paper | Wheel         |
| #Source bboxes    | 589      | 1613      | 1797         | 1428    | 542     | 196          | 56138         |
| #Confusion bboxes | 197      | 241       | 480          | 180     | 121     | 81           | 11066         |

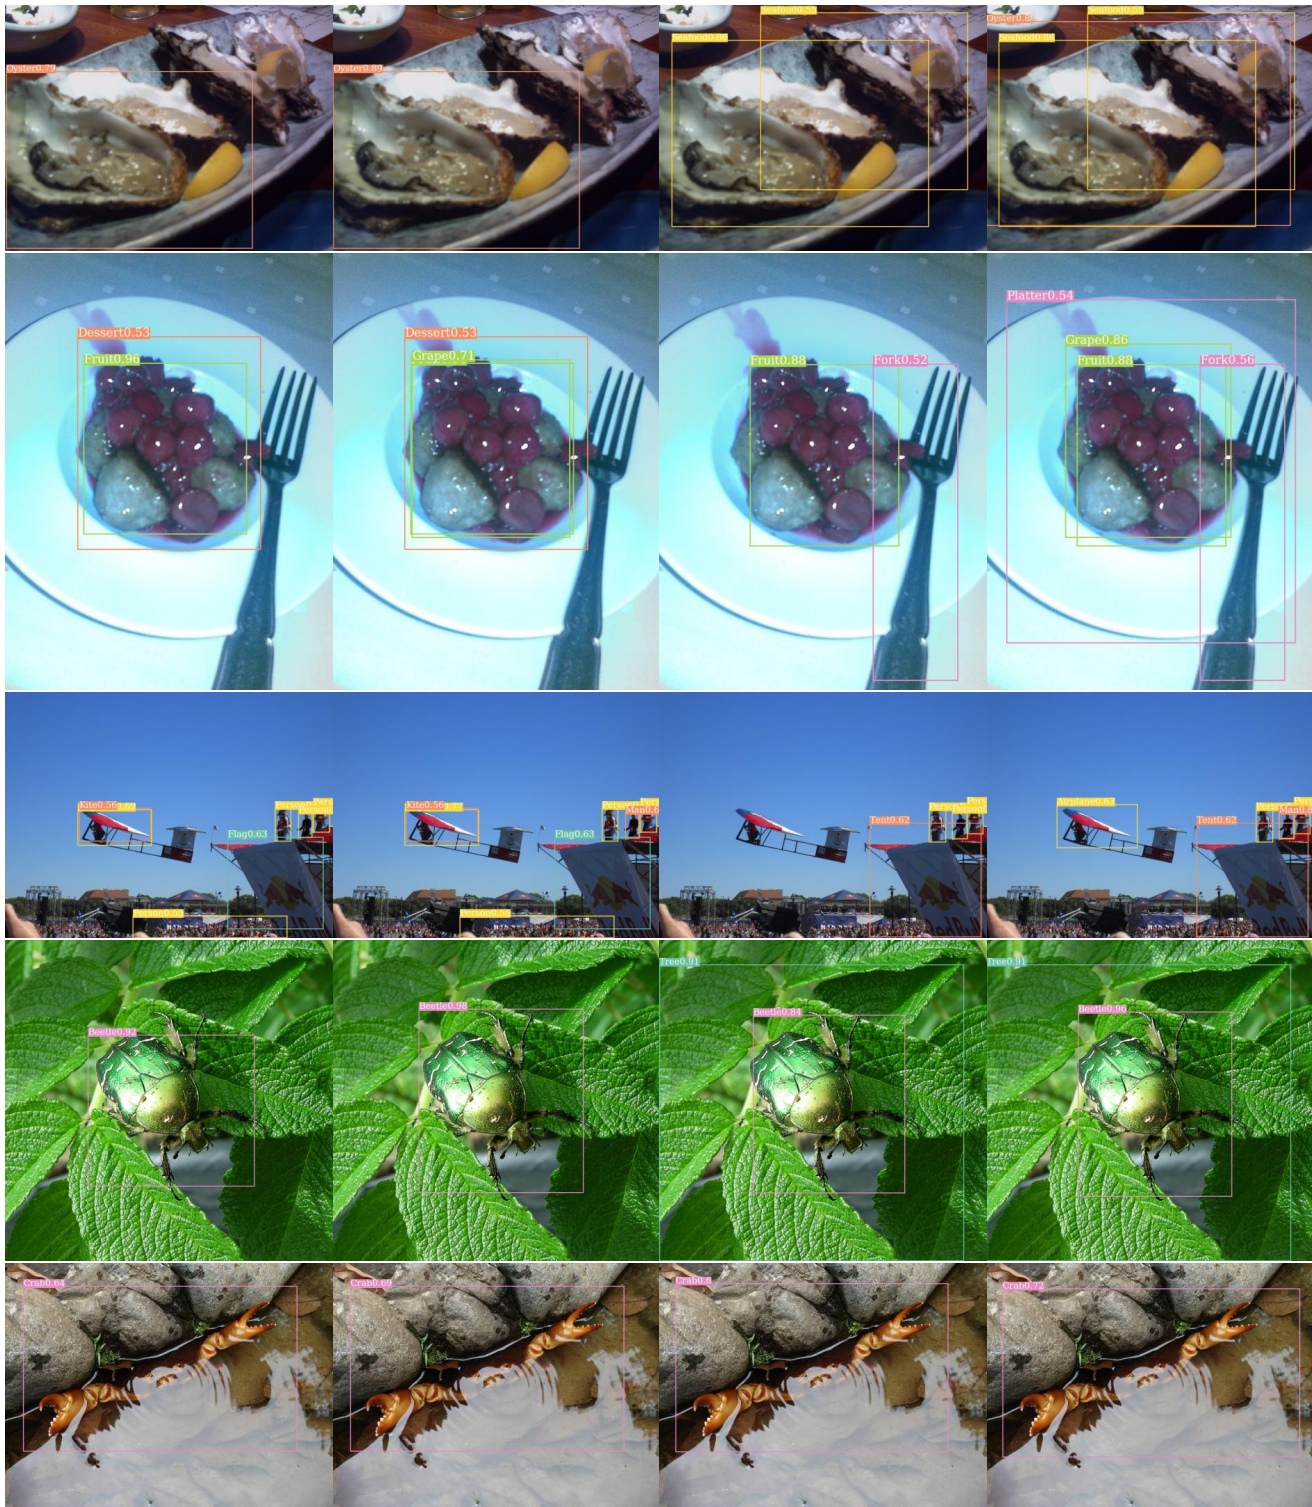

**Figure 1.** Examples of detection results on Open Images dataset. We abbreviate softmax as *sm* and concurrent softmax as *csm* here. From left to right: *sm-train+sm-test*, *sm-train+csm-test*, *csm-train+sm-test*, *csm-train+csm-test*. We set the score threshold to 0.5 for visualization.



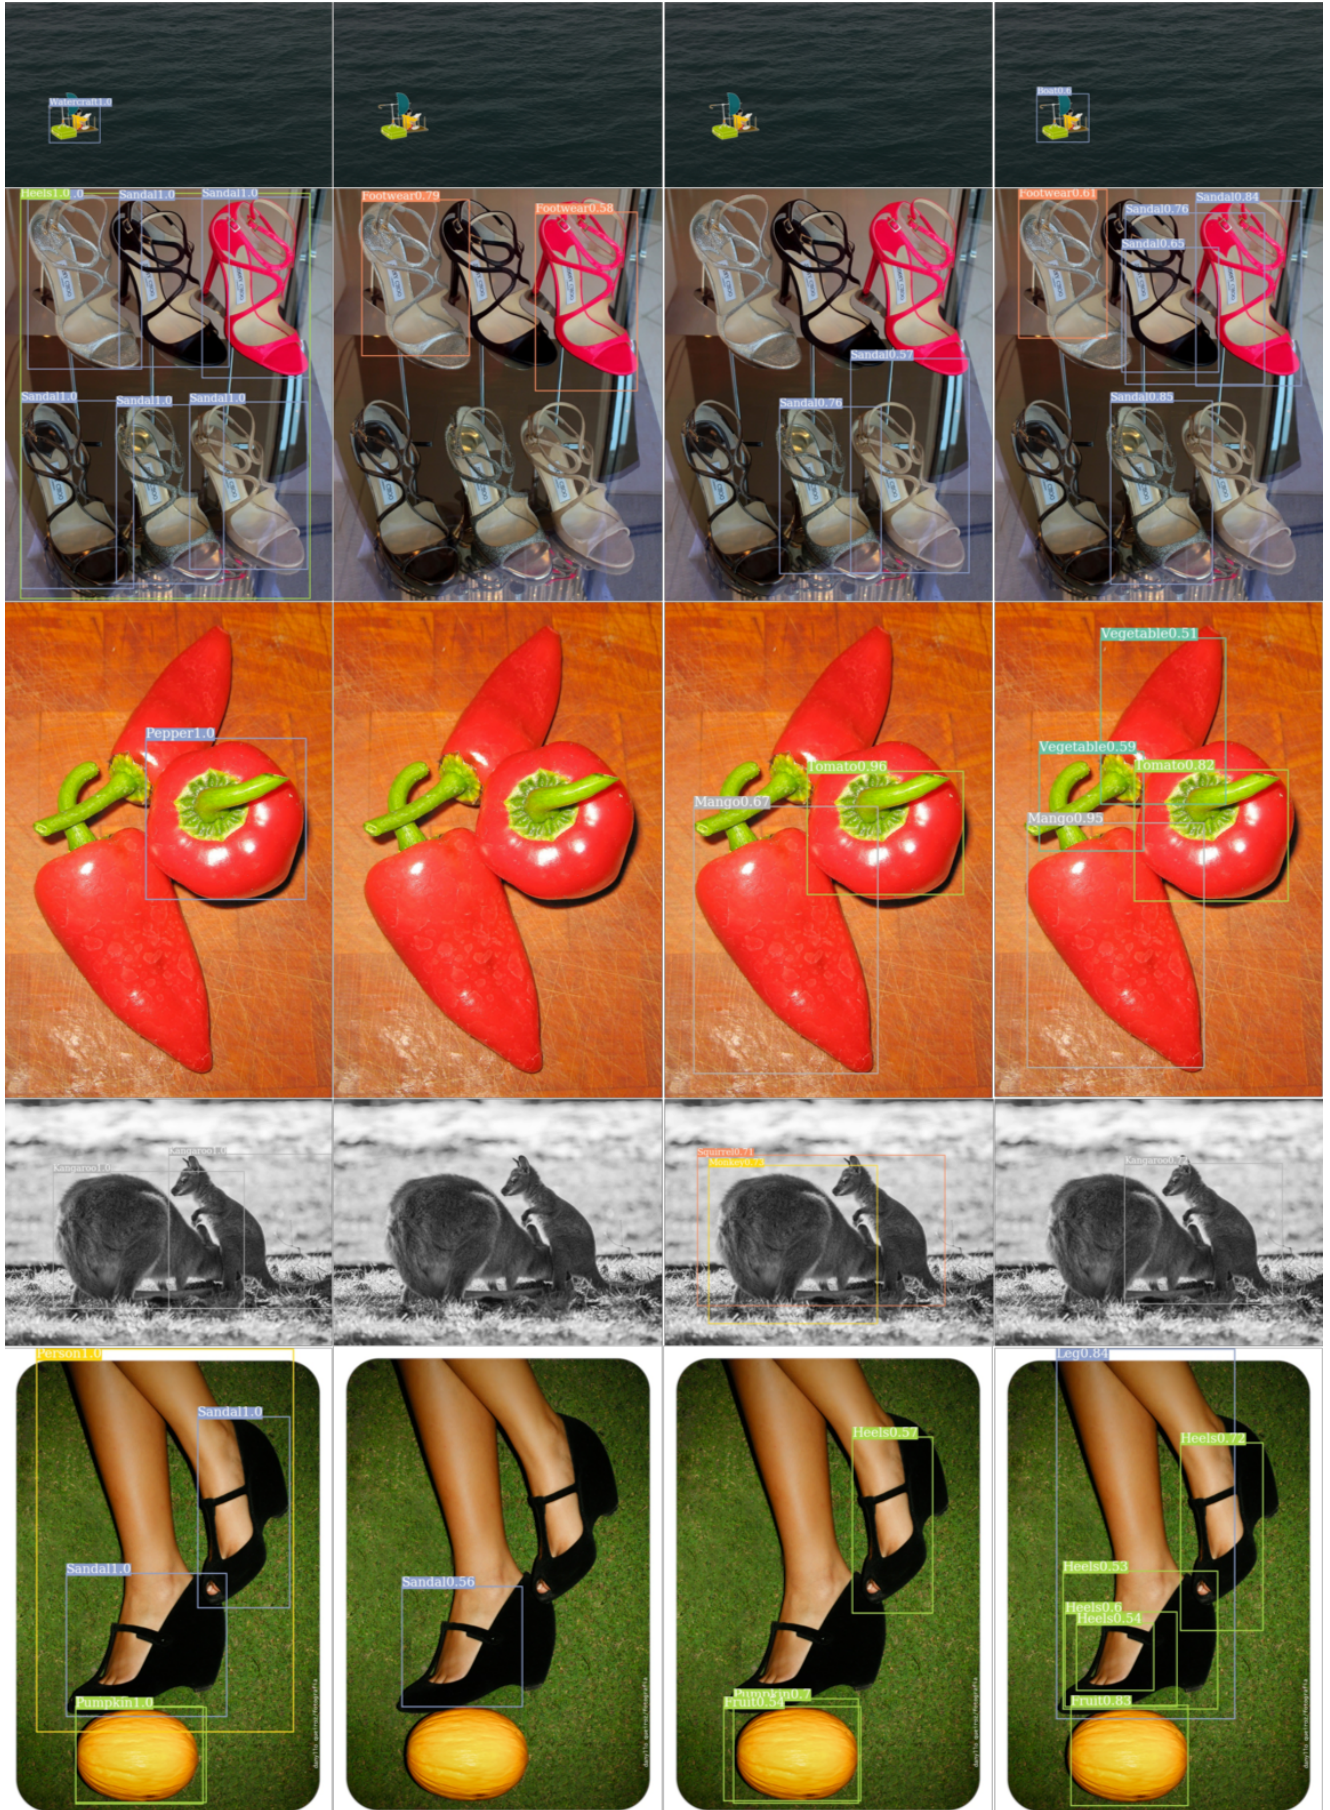

**Figure 2.** Examples of detection results on Open Images dataset. From left to right: ground truth, non-balance, class-aware balance, soft-balance. We set the score threshold to 0.5 for visualization.
